# Supplementary material for: Transcultural adaptation and psychometric study of the French version of the nursing home survey on patient safety culture questionnaire
Source: Springer Nature journal article supplement (doi:10.1186/s12913-019-4333-5), 2019-07-15
Supplement: MOESM1 [file 16929746]

## A. Le travail dans votre établissement

| Dans quelle mesure êtes-vous en accord ou en désaccord avec les affirmations suivantes? |                                                                                                    | Pas du tout d'accord<br>▼  | Pas d'accord<br>▼          | Moyennement d'accord<br>▼  | D'accord<br>▼              | Tout à fait d'accord<br>▼  | Ne sais pas ou non applicable<br>▼ |
|-----------------------------------------------------------------------------------------|----------------------------------------------------------------------------------------------------|----------------------------|----------------------------|----------------------------|----------------------------|----------------------------|------------------------------------|
| A1                                                                                      | Les membres du personnel de cet établissement se respectent les uns les autres.                    | <input type="checkbox"/> 1 | <input type="checkbox"/> 2 | <input type="checkbox"/> 3 | <input type="checkbox"/> 4 | <input type="checkbox"/> 5 | <input type="checkbox"/> 9         |
| A2                                                                                      | Les membres du personnel de cet établissement se soutiennent entre eux.                            | <input type="checkbox"/> 1 | <input type="checkbox"/> 2 | <input type="checkbox"/> 3 | <input type="checkbox"/> 4 | <input type="checkbox"/> 5 | <input type="checkbox"/> 9         |
| A3                                                                                      | Nous avons suffisamment de personnel pour faire face à la charge de travail.                       | <input type="checkbox"/> 1 | <input type="checkbox"/> 2 | <input type="checkbox"/> 3 | <input type="checkbox"/> 4 | <input type="checkbox"/> 5 | <input type="checkbox"/> 9         |
| A4                                                                                      | Le personnel suit les procédures de prise en charge des résidents.                                 | <input type="checkbox"/> 1 | <input type="checkbox"/> 2 | <input type="checkbox"/> 3 | <input type="checkbox"/> 4 | <input type="checkbox"/> 5 | <input type="checkbox"/> 9         |
| A5                                                                                      | Les membres du personnel du service ont le sentiment de faire partie d'une équipe.                 | <input type="checkbox"/> 1 | <input type="checkbox"/> 2 | <input type="checkbox"/> 3 | <input type="checkbox"/> 4 | <input type="checkbox"/> 5 | <input type="checkbox"/> 9         |
| A6                                                                                      | Pour accomplir ses tâches plus rapidement, le personnel ne respecte pas l'ensemble des procédures. | <input type="checkbox"/> 1 | <input type="checkbox"/> 2 | <input type="checkbox"/> 3 | <input type="checkbox"/> 4 | <input type="checkbox"/> 5 | <input type="checkbox"/> 9         |
| A7                                                                                      | Le personnel de cet établissement reçoit les formations dont il a besoin.                          | <input type="checkbox"/> 1 | <input type="checkbox"/> 2 | <input type="checkbox"/> 3 | <input type="checkbox"/> 4 | <input type="checkbox"/> 5 | <input type="checkbox"/> 9         |
| A8                                                                                      | Les membres du personnel doivent se dépêcher car ils ont trop de travail.                          | <input type="checkbox"/> 1 | <input type="checkbox"/> 2 | <input type="checkbox"/> 3 | <input type="checkbox"/> 4 | <input type="checkbox"/> 5 | <input type="checkbox"/> 9         |
| A9                                                                                      | Lorsque quelqu'un a trop de travail, les autres membres de l'équipe lui viennent en aide.          | <input type="checkbox"/> 1 | <input type="checkbox"/> 2 | <input type="checkbox"/> 3 | <input type="checkbox"/> 4 | <input type="checkbox"/> 5 | <input type="checkbox"/> 9         |
| A10                                                                                     | En cas de dommage subi par un résident, le personnel est tenu pour responsable.                    | <input type="checkbox"/> 1 | <input type="checkbox"/> 2 | <input type="checkbox"/> 3 | <input type="checkbox"/> 4 | <input type="checkbox"/> 5 | <input type="checkbox"/> 9         |
| A11                                                                                     | Le personnel est suffisamment formé pour prendre en charge les résidents difficiles.               | <input type="checkbox"/> 1 | <input type="checkbox"/> 2 | <input type="checkbox"/> 3 | <input type="checkbox"/> 4 | <input type="checkbox"/> 5 | <input type="checkbox"/> 9         |
| A12                                                                                     | Le personnel a peur de signaler ses erreurs.                                                       | <input type="checkbox"/> 1 | <input type="checkbox"/> 2 | <input type="checkbox"/> 3 | <input type="checkbox"/> 4 | <input type="checkbox"/> 5 | <input type="checkbox"/> 9         |
| A13                                                                                     | Le personnel comprend les formations suivies dans l'établissement.                                 | <input type="checkbox"/> 1 | <input type="checkbox"/> 2 | <input type="checkbox"/> 3 | <input type="checkbox"/> 4 | <input type="checkbox"/> 5 | <input type="checkbox"/> 9         |

| A. Le travail dans votre établissement (Suite) |                                                                                                                            | Pas du tout d'accord<br>▼  | Pas d'accord<br>▼          | Moyennement d'accord<br>▼  | D'accord<br>▼              | Tout à fait d'accord<br>▼  | Ne sais pas ou non applicable<br>▼ |
|------------------------------------------------|----------------------------------------------------------------------------------------------------------------------------|----------------------------|----------------------------|----------------------------|----------------------------|----------------------------|------------------------------------|
| A14.                                           | Pour faciliter son travail, le personnel contourne souvent les procédures.                                                 | <input type="checkbox"/> 1 | <input type="checkbox"/> 2 | <input type="checkbox"/> 3 | <input type="checkbox"/> 4 | <input type="checkbox"/> 5 | <input type="checkbox"/> 9         |
| A15.                                           | Le personnel est traité de façon appropriée quand il commet une erreur.                                                    | <input type="checkbox"/> 1 | <input type="checkbox"/> 2 | <input type="checkbox"/> 3 | <input type="checkbox"/> 4 | <input type="checkbox"/> 5 | <input type="checkbox"/> 9         |
| A16.                                           | Les besoins des résidents sont satisfaits durant les changements d'équipe.                                                 | <input type="checkbox"/> 1 | <input type="checkbox"/> 2 | <input type="checkbox"/> 3 | <input type="checkbox"/> 4 | <input type="checkbox"/> 5 | <input type="checkbox"/> 9         |
| A17.                                           | Il est difficile d'assurer la sécurité des résidents du fait d'un grand nombre de départs volontaires (ex. démissions...). | <input type="checkbox"/> 1 | <input type="checkbox"/> 2 | <input type="checkbox"/> 3 | <input type="checkbox"/> 4 | <input type="checkbox"/> 5 | <input type="checkbox"/> 9         |
| A18.                                           | Le personnel a le sentiment de pouvoir signaler ses erreurs en toute sécurité.                                             | <input type="checkbox"/> 1 | <input type="checkbox"/> 2 | <input type="checkbox"/> 3 | <input type="checkbox"/> 4 | <input type="checkbox"/> 5 | <input type="checkbox"/> 9         |

## B. Communications

| A quelle fréquence les situations suivantes surviennent-elles dans votre établissement? |                                                                                                                       | Jamais<br>▼                | Rarement<br>▼              | Quelque-fois<br>▼          | La plupart du temps<br>▼   | Toujours<br>▼              | Ne sais pas ou non applicable<br>▼ |
|-----------------------------------------------------------------------------------------|-----------------------------------------------------------------------------------------------------------------------|----------------------------|----------------------------|----------------------------|----------------------------|----------------------------|------------------------------------|
| B1.                                                                                     | Avant de s'occuper d'un résident pour la première fois, le personnel reçoit toutes les informations dont il a besoin. | <input type="checkbox"/> 1 | <input type="checkbox"/> 2 | <input type="checkbox"/> 3 | <input type="checkbox"/> 4 | <input type="checkbox"/> 5 | <input type="checkbox"/> 9         |
| B2.                                                                                     | Le personnel est informé immédiatement lorsqu'un changement survient dans le plan de prise en charge d'un résident.   | <input type="checkbox"/> 1 | <input type="checkbox"/> 2 | <input type="checkbox"/> 3 | <input type="checkbox"/> 4 | <input type="checkbox"/> 5 | <input type="checkbox"/> 9         |
| B3.                                                                                     | Le personnel dispose de toutes les informations nécessaires lorsqu'un résident revient de l'hôpital.                  | <input type="checkbox"/> 1 | <input type="checkbox"/> 2 | <input type="checkbox"/> 3 | <input type="checkbox"/> 4 | <input type="checkbox"/> 5 | <input type="checkbox"/> 9         |
| B4.                                                                                     | Quand le personnel signale quelque chose qui pourrait nuire à un résident, une personne s'en occupe.                  | <input type="checkbox"/> 1 | <input type="checkbox"/> 2 | <input type="checkbox"/> 3 | <input type="checkbox"/> 4 | <input type="checkbox"/> 5 | <input type="checkbox"/> 9         |
| B5.                                                                                     | Dans cet établissement, nous réfléchissons ensemble aux moyens d'éviter qu'un incident ne se reproduise.              | <input type="checkbox"/> 1 | <input type="checkbox"/> 2 | <input type="checkbox"/> 3 | <input type="checkbox"/> 4 | <input type="checkbox"/> 5 | <input type="checkbox"/> 9         |
| B6.                                                                                     | S'ils voient quelque chose qui pourrait nuire à un résident, les membres du personnel en parlent à une personne.      | <input type="checkbox"/> 1 | <input type="checkbox"/> 2 | <input type="checkbox"/> 3 | <input type="checkbox"/> 4 | <input type="checkbox"/> 5 | <input type="checkbox"/> 9         |
| B7.                                                                                     | Cet établissement attache de l'importance au partage des idées et aux suggestions du personnel.                       | <input type="checkbox"/> 1 | <input type="checkbox"/> 2 | <input type="checkbox"/> 3 | <input type="checkbox"/> 4 | <input type="checkbox"/> 5 | <input type="checkbox"/> 9         |
| B8.                                                                                     | Dans cet établissement, nous discutons de la façon d'assurer la protection des résidents.                             | <input type="checkbox"/> 1 | <input type="checkbox"/> 2 | <input type="checkbox"/> 3 | <input type="checkbox"/> 4 | <input type="checkbox"/> 5 | <input type="checkbox"/> 9         |
| B9.                                                                                     | Cet établissement ne tient pas compte de l'opinion du personnel.                                                      | <input type="checkbox"/> 1 | <input type="checkbox"/> 2 | <input type="checkbox"/> 3 | <input type="checkbox"/> 4 | <input type="checkbox"/> 5 | <input type="checkbox"/> 9         |

|      |                                                                                             |                            |                            |                            |                            |                            |                            |
|------|---------------------------------------------------------------------------------------------|----------------------------|----------------------------|----------------------------|----------------------------|----------------------------|----------------------------|
| B10. | Le personnel reçoit toute l'information nécessaire à la prise en charge des résidents.      | <input type="checkbox"/> 1 | <input type="checkbox"/> 2 | <input type="checkbox"/> 3 | <input type="checkbox"/> 4 | <input type="checkbox"/> 5 | <input type="checkbox"/> 9 |
| B11. | Il est facile pour le personnel de parler ouvertement des problèmes dans cet établissement. | <input type="checkbox"/> 1 | <input type="checkbox"/> 2 | <input type="checkbox"/> 3 | <input type="checkbox"/> 4 | <input type="checkbox"/> 5 | <input type="checkbox"/> 9 |

### C. Votre responsable

| Dans quelle mesure êtes-vous en accord ou en désaccord avec les affirmations suivantes? |                                                                                                            | Jamais                     | Rarement                   | Quelque fois               | La plupart du temps        | Toujours                   | Ne sais pas ou non applicable |
|-----------------------------------------------------------------------------------------|------------------------------------------------------------------------------------------------------------|----------------------------|----------------------------|----------------------------|----------------------------|----------------------------|-------------------------------|
|                                                                                         |                                                                                                            | ▼                          | ▼                          | ▼                          | ▼                          | ▼                          | ▼                             |
| C1.                                                                                     | Mon responsable est à l'écoute des idées et suggestions du personnel concernant la sécurité des résidents. | <input type="checkbox"/> 1 | <input type="checkbox"/> 2 | <input type="checkbox"/> 3 | <input type="checkbox"/> 4 | <input type="checkbox"/> 5 | <input type="checkbox"/> 9    |
| C2.                                                                                     | Mon responsable encourage le personnel qui respecte les procédures.                                        | <input type="checkbox"/> 1 | <input type="checkbox"/> 2 | <input type="checkbox"/> 3 | <input type="checkbox"/> 4 | <input type="checkbox"/> 5 | <input type="checkbox"/> 9    |
| C3.                                                                                     | Mon responsable est attentif aux problèmes de sécurité des résidents dans l'établissement.                 | <input type="checkbox"/> 1 | <input type="checkbox"/> 2 | <input type="checkbox"/> 3 | <input type="checkbox"/> 4 | <input type="checkbox"/> 5 | <input type="checkbox"/> 9    |

### D. Votre établissement

| Dans quelle mesure êtes-vous en accord ou en désaccord avec les affirmations suivantes? |                                                                                                                | Jamais                     | Rarement                   | Quelque fois               | La plupart du temps        | Toujours                   | Ne sais pas ou non applicable |
|-----------------------------------------------------------------------------------------|----------------------------------------------------------------------------------------------------------------|----------------------------|----------------------------|----------------------------|----------------------------|----------------------------|-------------------------------|
|                                                                                         |                                                                                                                | ▼                          | ▼                          | ▼                          | ▼                          | ▼                          | ▼                             |
| D1.                                                                                     | On prend bien soin des résidents dans cet établissement.                                                       | <input type="checkbox"/> 1 | <input type="checkbox"/> 2 | <input type="checkbox"/> 3 | <input type="checkbox"/> 4 | <input type="checkbox"/> 5 | <input type="checkbox"/> 9    |
| D2.                                                                                     | La direction demande au personnel comment améliorer la sécurité des résidents de l'établissement.              | <input type="checkbox"/> 1 | <input type="checkbox"/> 2 | <input type="checkbox"/> 3 | <input type="checkbox"/> 4 | <input type="checkbox"/> 5 | <input type="checkbox"/> 9    |
| D3.                                                                                     | Cet établissement laisse les mêmes erreurs se reproduire encore et encore.                                     | <input type="checkbox"/> 1 | <input type="checkbox"/> 2 | <input type="checkbox"/> 3 | <input type="checkbox"/> 4 | <input type="checkbox"/> 5 | <input type="checkbox"/> 9    |
| D4.                                                                                     | Dans cet établissement, il est facile d'apporter des changements visant à améliorer la sécurité des résidents. | <input type="checkbox"/> 1 | <input type="checkbox"/> 2 | <input type="checkbox"/> 3 | <input type="checkbox"/> 4 | <input type="checkbox"/> 5 | <input type="checkbox"/> 9    |
| D5.                                                                                     | Cet établissement agit constamment en faveur de l'amélioration de la sécurité des résidents.                   | <input type="checkbox"/> 1 | <input type="checkbox"/> 2 | <input type="checkbox"/> 3 | <input type="checkbox"/> 4 | <input type="checkbox"/> 5 | <input type="checkbox"/> 9    |
| D6.                                                                                     | Cet établissement réalise un bon travail pour assurer la sécurité des résidents                                | <input type="checkbox"/> 1 | <input type="checkbox"/> 2 | <input type="checkbox"/> 3 | <input type="checkbox"/> 4 | <input type="checkbox"/> 5 | <input type="checkbox"/> 9    |
| D7.                                                                                     | La direction est à l'écoute des idées et suggestions du personnel pour améliorer la sécurité des résidents.    | <input type="checkbox"/> 1 | <input type="checkbox"/> 2 | <input type="checkbox"/> 3 | <input type="checkbox"/> 4 | <input type="checkbox"/> 5 | <input type="checkbox"/> 9    |
| D8.                                                                                     | Cet établissement est un endroit sûr pour les résidents.                                                       | <input type="checkbox"/> 1 | <input type="checkbox"/> 2 | <input type="checkbox"/> 3 | <input type="checkbox"/> 4 | <input type="checkbox"/> 5 | <input type="checkbox"/> 9    |

|     |                                                                                                                                            |                            |                            |                            |                            |                            |                            |
|-----|--------------------------------------------------------------------------------------------------------------------------------------------|----------------------------|----------------------------|----------------------------|----------------------------|----------------------------|----------------------------|
| D9. | La direction fait souvent le tour de l'établissement pour apprécier les soins donnés aux résidents.                                        | <input type="checkbox"/> 1 | <input type="checkbox"/> 2 | <input type="checkbox"/> 3 | <input type="checkbox"/> 4 | <input type="checkbox"/> 5 | <input type="checkbox"/> 9 |
| D10 | Lorsque des actions d'amélioration de la sécurité des résidents sont mises en place, l'établissement vérifie qu'elles ont bien fonctionné. | <input type="checkbox"/> 1 | <input type="checkbox"/> 2 | <input type="checkbox"/> 3 | <input type="checkbox"/> 4 | <input type="checkbox"/> 5 | <input type="checkbox"/> 9 |

## E. Evaluation globale

E1. Je pourrais dire à mes amis que c'est un établissement sûr pour les membres de leur famille.

☐ Oui

☐ Peut-être

☐ Non

E2. Globalement, comment jugez-vous la sécurité des résidents dans votre établissement ?

☐ Faible

☐ Moyenne

☐ Bonne

☐ Très bonne

☐ Excellente
