# Supplementary material for: Transcultural adaptation and psychometric study of the French version of the nursing home survey on patient safety culture questionnaire
Source: Springer Nature journal article supplement (doi:10.1186/s12913-019-4333-5), 2019-07-15
Supplement: MOESM2 [file 16929746]

Additional file 2

Table: Correlation coefficients across the seven principal factors of the exploratory factor analysis

|          | 1    | 2    | 3    | 4    | 5    | 6    | 7    |
|----------|------|------|------|------|------|------|------|
| Factor 1 | 1.00 |      |      |      |      |      |      |
| Factor 2 | 0.54 | 1.00 |      |      |      |      |      |
| Factor 3 | 0.26 | 0.35 | 1.00 |      |      |      |      |
| Factor 4 | 0.56 | 0.48 | 0.35 | 1.00 |      |      |      |
| Factor 5 | 0.32 | 0.36 | 0.32 | 0.21 | 1.00 |      |      |
| Factor 6 | 0.34 | 0.27 | 0.15 | 0.21 | 0.26 | 1.00 |      |
| Factor 7 | 0.59 | 0.58 | 0.35 | 0.56 | 0.33 | 0.13 | 1.00 |
