# Supplementary material for: Transcultural adaptation and psychometric study of the French version of the nursing home survey on patient safety culture questionnaire
Source: Springer Nature journal article supplement (doi:10.1186/s12913-019-4333-5), 2019-07-15
Supplement: MOESM3 [file 16929746]

Additional file 3

Table : Indicators to assess the global fit of the original structural equation model (R output)

|                     |                 |             |            |                   |                   |
|---------------------|-----------------|-------------|------------|-------------------|-------------------|
| npar                | fmin            | chisq       | df         | pvalue            | baseline.chisq    |
| 150.000             | 1.574           | 2313.325    | 753.000    | 0.000             | 15527.471         |
| baseline.df         | baseline.pvalue | cfi         | tli        | nnfi              | rfi               |
| 861.000             | 0.000           | 0.894       | 0.878      | 0.878             | 0.830             |
| nfi                 | pnfi            | ifi         | rni        | logl              | unrestricted.logl |
| 0.851               | 0.744           | 0.894       | 0.894      | -33132.802        | -31974.566        |
| aic                 | bic             | ntotal      | bic2       | rmsea             | rmsea.ci.lower    |
| 66565.604           | 67255.789       | 736.000     | 66779.488  | 0.053             | 0.051             |
| rmsea.ci.upper      | rmsea.pvalue    | rmr         | rmr_nomean | srmr              | srmr_bentler      |
| 0.056               | 0.019           | 0.045       | 0.045      | 0.057             | 0.057             |
| srmr_bentler_nomean | crmr            | crmr_nomean | srmr_mplus | srmr_mplus_nomean | cn_05             |
| 0.057               | 0.058           | 0.058       | 0.057      | 0.057             | 260.882           |
| cn_01               | gfi             | agfi        | pgfi       | mfi               | ecvi              |
| 269.861             | 0.864           | 0.836       | 0.720      | 0.346             | 3.556             |
