# Supplementary material for: Transcultural adaptation and psychometric study of the French version of the nursing home survey on patient safety culture questionnaire
Source: Springer Nature journal article supplement (doi:10.1186/s12913-019-4333-5), 2019-07-15
Supplement: MOESM4 [file 16929746]

Additional file 4

Table: Spearman's correlation coefficients between the 42 items

|     | A1   | A2   | A3   | A4   | A5   | A6   | A7   | A8   | A9   | A10  | A11  | A12  | A13  | A14  | A15  | A16  | A17  | A18  | B1   | B2   | B3   | B4   | B5   | B6   | B7   | B8   | B9   | B10  | B11  | C1   | C2   | C3   | D1   | D2   | D3   | D4   | D5   | D6   | D7   | D8   | D9   | D10  |
|-----|------|------|------|------|------|------|------|------|------|------|------|------|------|------|------|------|------|------|------|------|------|------|------|------|------|------|------|------|------|------|------|------|------|------|------|------|------|------|------|------|------|------|
| A1  | 1,00 | 0,68 | 0,08 | 0,33 | 0,53 | 0,20 | 0,07 | 0,03 | 0,43 | 0,06 | 0,10 | 0,19 | 0,21 | 0,22 | 0,20 | 0,24 | 0,15 | 0,24 | 0,22 | 0,21 | 0,12 | 0,23 | 0,21 | 0,22 | 0,24 | 0,21 | 0,19 | 0,20 | 0,27 | 0,21 | 0,22 | 0,19 | 0,25 | 0,11 | 0,29 | 0,19 | 0,23 | 0,25 | 0,20 | 0,19 | 0,16 | 0,16 |
| A2  | 0,68 | 1,00 | 0,07 | 0,29 | 0,49 | 0,20 | 0,11 | 0,05 | 0,47 | 0,05 | 0,10 | 0,18 | 0,22 | 0,18 | 0,23 | 0,22 | 0,16 | 0,25 | 0,22 | 0,24 | 0,11 | 0,22 | 0,22 | 0,24 | 0,20 | 0,19 | 0,16 | 0,21 | 0,30 | 0,19 | 0,23 | 0,18 | 0,24 | 0,10 | 0,23 | 0,19 | 0,20 | 0,23 | 0,16 | 0,19 | 0,14 | 0,13 |
| A3  | 0,08 | 0,07 | 1,00 | 0,21 | 0,11 | 0,14 | 0,27 | 0,62 | 0,08 | 0,04 | 0,33 | 0,04 | 0,11 | 0,14 | 0,20 | 0,25 | 0,30 | 0,20 | 0,26 | 0,15 | 0,15 | 0,23 | 0,17 | 0,04 | 0,29 | 0,20 | 0,22 | 0,19 | 0,22 | 0,20 | 0,13 | 0,18 | 0,24 | 0,29 | 0,24 | 0,24 | 0,28 | 0,30 | 0,33 | 0,27 | 0,33 | 0,25 |
| A4  | 0,33 | 0,29 | 0,21 | 1,00 | 0,40 | 0,40 | 0,23 | 0,14 | 0,29 | 0,07 | 0,23 | 0,23 | 0,24 | 0,46 | 0,14 | 0,32 | 0,18 | 0,21 | 0,23 | 0,27 | 0,18 | 0,24 | 0,35 | 0,29 | 0,25 | 0,31 | 0,10 | 0,26 | 0,24 | 0,20 | 0,18 | 0,22 | 0,37 | 0,22 | 0,32 | 0,22 | 0,31 | 0,36 | 0,24 | 0,36 | 0,24 | 0,32 |
| A5  | 0,53 | 0,49 | 0,11 | 0,40 | 1,00 | 0,27 | 0,20 | 0,08 | 0,42 | 0,10 | 0,18 | 0,26 | 0,34 | 0,28 | 0,26 | 0,27 | 0,23 | 0,29 | 0,27 | 0,29 | 0,19 | 0,24 | 0,26 | 0,29 | 0,29 | 0,27 | 0,24 | 0,24 | 0,29 | 0,22 | 0,24 | 0,20 | 0,23 | 0,15 | 0,29 | 0,22 | 0,23 | 0,25 | 0,24 | 0,22 | 0,19 | 0,22 |
| A6  | 0,20 | 0,20 | 0,14 | 0,40 | 0,27 | 1,00 | 0,09 | 0,27 | 0,21 | 0,17 | 0,16 | 0,33 | 0,16 | 0,58 | 0,13 | 0,28 | 0,21 | 0,16 | 0,21 | 0,24 | 0,14 | 0,16 | 0,19 | 0,21 | 0,21 | 0,24 | 0,21 | 0,26 | 0,17 | 0,18 | 0,18 | 0,20 | 0,35 | 0,18 | 0,32 | 0,20 | 0,25 | 0,26 | 0,20 | 0,27 | 0,22 | 0,27 |
| A7  | 0,07 | 0,11 | 0,27 | 0,23 | 0,20 | 0,09 | 1,00 | 0,19 | 0,08 | 0,03 | 0,42 | 0,07 | 0,34 | 0,18 | 0,29 | 0,18 | 0,19 | 0,26 | 0,27 | 0,22 | 0,16 | 0,28 | 0,29 | 0,16 | 0,37 | 0,33 | 0,24 | 0,27 | 0,26 | 0,30 | 0,28 | 0,31 | 0,20 | 0,38 | 0,31 | 0,29 | 0,39 | 0,34 | 0,40 | 0,28 | 0,31 | 0,37 |
| A8  | 0,03 | 0,05 | 0,62 | 0,14 | 0,08 | 0,27 | 0,19 | 1,00 | 0,06 | 0,13 | 0,27 | 0,11 | 0,05 | 0,19 | 0,21 | 0,24 | 0,29 | 0,17 | 0,23 | 0,21 | 0,21 | 0,22 | 0,16 | 0,03 | 0,25 | 0,19 | 0,20 | 0,23 | 0,21 | 0,20 | 0,17 | 0,21 | 0,26 | 0,25 | 0,26 | 0,21 | 0,24 | 0,24 | 0,28 | 0,24 | 0,28 | 0,23 |
| A9  | 0,43 | 0,47 | 0,08 | 0,29 | 0,42 | 0,21 | 0,08 | 0,06 | 1,00 | 0,03 | 0,13 | 0,20 | 0,20 | 0,25 | 0,20 | 0,20 | 0,14 | 0,22 | 0,24 | 0,26 | 0,20 | 0,22 | 0,24 | 0,25 | 0,26 | 0,22 | 0,11 | 0,24 | 0,21 | 0,23 | 0,20 | 0,17 | 0,22 | 0,11 | 0,21 | 0,19 | 0,15 | 0,18 | 0,18 | 0,17 | 0,14 | 0,16 |
| A10 | 0,06 | 0,05 | 0,04 | 0,07 | 0,10 | 0,17 | 0,03 | 0,13 | 0,03 | 1,00 | 0,03 | 0,25 | 0,07 | 0,16 | 0,14 | 0,18 | 0,19 | 0,19 | 0,16 | 0,11 | 0,07 | 0,06 | 0,04 | 0,07 | 0,13 | 0,06 | 0,08 | 0,16 | 0,18 | 0,08 | 0,00 | 0,04 | 0,16 | 0,02 | 0,13 | 0,11 | 0,08 | 0,05 | 0,09 | 0,08 | 0,04 | 0,02 |
| A11 | 0,10 | 0,10 | 0,33 | 0,23 | 0,18 | 0,16 | 0,42 | 0,27 | 0,13 | 0,03 | 1,00 | 0,16 | 0,22 | 0,15 | 0,25 | 0,23 | 0,21 | 0,26 | 0,22 | 0,26 | 0,21 | 0,20 | 0,21 | 0,10 | 0,29 | 0,27 | 0,13 | 0,27 | 0,23 | 0,19 | 0,16 | 0,21 | 0,22 | 0,28 | 0,23 | 0,26 | 0,29 | 0,31 | 0,31 | 0,24 | 0,32 | 0,28 |
| A12 | 0,19 | 0,18 | 0,04 | 0,23 | 0,26 | 0,33 | 0,07 | 0,11 | 0,20 | 0,25 | 0,16 | 1,00 | 0,16 | 0,35 | 0,16 | 0,22 | 0,20 | 0,38 | 0,19 | 0,12 | 0,14 | 0,16 | 0,18 | 0,23 | 0,18 | 0,21 | 0,14 | 0,21 | 0,24 | 0,17 | 0,17 | 0,16 | 0,20 | 0,12 | 0,24 | 0,13 | 0,10 | 0,16 | 0,14 | 0,18 | 0,14 | 0,18 |
| A13 | 0,21 | 0,22 | 0,11 | 0,24 | 0,34 | 0,16 | 0,34 | 0,05 | 0,20 | 0,07 | 0,22 | 0,16 | 1,00 | 0,27 | 0,21 | 0,16 | 0,18 | 0,22 | 0,17 | 0,16 | 0,11 | 0,16 | 0,21 | 0,25 | 0,16 | 0,25 | 0,10 | 0,20 | 0,16 | 0,18 | 0,15 | 0,23 | 0,19 | 0,19 | 0,17 | 0,18 | 0,25 | 0,24 | 0,22 | 0,20 | 0,17 | 0,26 |
| A14 | 0,22 | 0,18 | 0,14 | 0,46 | 0,28 | 0,58 | 0,18 | 0,19 | 0,25 | 0,16 | 0,15 | 0,35 | 0,27 | 1,00 | 0,12 | 0,27 | 0,26 | 0,21 | 0,23 | 0,23 | 0,15 | 0,20 | 0,33 | 0,29 | 0,24 | 0,32 | 0,14 | 0,29 | 0,18 | 0,21 | 0,21 | 0,24 | 0,33 | 0,27 | 0,32 | 0,22 | 0,29 | 0,30 | 0,27 | 0,33 | 0,22 | 0,30 |
| A15 | 0,20 | 0,23 | 0,20 | 0,14 | 0,26 | 0,13 | 0,29 | 0,21 | 0,20 | 0,14 | 0,25 | 0,16 | 0,21 | 0,12 | 1,00 | 0,25 | 0,25 | 0,46 | 0,24 | 0,26 | 0,20 | 0,31 | 0,31 | 0,21 | 0,38 | 0,28 | 0,28 | 0,22 | 0,37 | 0,34 | 0,34 | 0,34 | 0,22 | 0,31 | 0,35 | 0,31 | 0,36 | 0,33 | 0,41 | 0,28 | 0,31 | 0,35 |
| A16 | 0,24 | 0,22 | 0,25 | 0,32 | 0,27 | 0,28 | 0,18 | 0,24 | 0,20 | 0,18 | 0,23 | 0,22 | 0,16 | 0,27 | 0,25 | 1,00 | 0,31 | 0,24 | 0,33 | 0,28 | 0,20 | 0,24 | 0,24 | 0,23 | 0,26 | 0,24 | 0,21 | 0,29 | 0,24 | 0,22 | 0,12 | 0,20 | 0,33 | 0,25 | 0,31 | 0,21 | 0,28 | 0,31 | 0,28 | 0,29 | 0,26 | 0,26 |
| A17 | 0,15 | 0,16 | 0,30 | 0,18 | 0,23 | 0,21 | 0,19 | 0,29 | 0,14 | 0,19 | 0,21 | 0,20 | 0,18 | 0,26 | 0,25 | 0,31 | 1,00 | 0,26 | 0,23 | 0,18 | 0,10 | 0,16 | 0,23 | 0,12 | 0,28 | 0,23 | 0,25 | 0,20 | 0,21 | 0,22 | 0,13 | 0,21 | 0,23 | 0,20 | 0,29 | 0,25 | 0,27 | 0,24 | 0,28 | 0,23 | 0,19 | 0,20 |
| A18 | 0,24 | 0,25 | 0,20 | 0,21 | 0,29 | 0,16 | 0,26 | 0,17 | 0,22 | 0,19 | 0,26 | 0,38 | 0,22 | 0,21 | 0,46 | 0,24 | 0,26 | 1,00 | 0,29 | 0,27 | 0,22 | 0,28 | 0,24 | 0,25 | 0,39 | 0,29 | 0,18 | 0,30 | 0,45 | 0,34 | 0,29 | 0,28 | 0,25 | 0,27 | 0,35 | 0,30 | 0,32 | 0,31 | 0,41 | 0,27 | 0,27 | 0,30 |
| B1  | 0,22 | 0,22 | 0,26 | 0,23 | 0,27 | 0,21 | 0,27 | 0,23 | 0,24 | 0,16 | 0,22 | 0,19 | 0,17 | 0,23 | 0,24 | 0,33 | 0,23 | 0,29 | 1,00 | 0,51 | 0,45 | 0,42 | 0,35 | 0,27 | 0,38 | 0,37 | 0,17 | 0,58 | 0,37 | 0,36 | 0,29 | 0,33 | 0,35 | 0,37 | 0,39 | 0,28 | 0,37 | 0,38 | 0,37 | 0,34 | 0,33 | 0,35 |
| B2  | 0,21 | 0,24 | 0,15 | 0,27 | 0,29 | 0,24 | 0,22 | 0,21 | 0,26 | 0,11 | 0,26 | 0,12 | 0,16 | 0,23 | 0,26 | 0,28 | 0,18 | 0,27 | 0,51 | 1,00 | 0,44 | 0,45 | 0,38 | 0,29 | 0,38 | 0,37 | 0,14 | 0,48 | 0,37 | 0,36 | 0,35 | 0,31 | 0,35 | 0,28 | 0,38 | 0,35 | 0,41 | 0,41 | 0,33 | 0,32 | 0,30 | 0,38 |
| B3  | 0,12 | 0,11 | 0,15 | 0,18 | 0,19 | 0,14 | 0,16 | 0,21 | 0,20 | 0,07 | 0,21 | 0,14 | 0,11 | 0,15 | 0,20 | 0,20 | 0,10 | 0,22 | 0,45 | 0,44 | 1,00 | 0,42 | 0,26 | 0,25 | 0,30 | 0,29 | 0,09 | 0,45 | 0,25 | 0,27 | 0,28 | 0,24 | 0,25 | 0,26 | 0,27 | 0,23 | 0,29 | 0,28 | 0,28 | 0,21 | 0,24 | 0,29 |
| B4  | 0,23 | 0,22 | 0,23 | 0,24 | 0,24 | 0,16 | 0,28 | 0,22 | 0,22 | 0,06 | 0,20 | 0,16 | 0,16 | 0,20 | 0,31 | 0,24 | 0,16 | 0,28 | 0,42 | 0,45 | 0,42 | 1,00 | 0,49 | 0,41 | 0,45 | 0,43 | 0,18 | 0,49 | 0,33 | 0,45 | 0,41 | 0,43 | 0,32 | 0,39 | 0,39 | 0,40 | 0,42 | 0,41 | 0,46 | 0,33 | 0,34 | 0,45 |
| B5  | 0,21 | 0,22 | 0,17 | 0,35 | 0,26 | 0,19 | 0,29 | 0,16 | 0,24 | 0,04 | 0,21 | 0,18 | 0,21 | 0,33 | 0,31 | 0,24 | 0,23 | 0,24 | 0,35 | 0,38 | 0,26 | 0,49 | 1,00 | 0,46 | 0,52 | 0,58 | 0,16 | 0,40 | 0,37 | 0,42 | 0,36 | 0,46 | 0,33 | 0,42 | 0,44 | 0,38 | 0,47 | 0,45 | 0,43 | 0,41 | 0,31 | 0,45 |
| B6  | 0,22 | 0,24 | 0,04 | 0,29 | 0,29 | 0,21 | 0,16 | 0,03 | 0,25 | 0,07 | 0,10 | 0,23 | 0,25 | 0,29 | 0,21 | 0,23 | 0,12 | 0,25 | 0,27 | 0,29 | 0,25 | 0,41 | 0,46 | 1,00 | 0,33 | 0,47 | 0,08 | 0,33 | 0,27 | 0,31 | 0,21 | 0,30 | 0,29 | 0,23 | 0,34 | 0,27 | 0,31 | 0,33 | 0,27 | 0,31 | 0,23 | 0,34 |
| B7  | 0,24 | 0,20 | 0,29 | 0,25 | 0,29 | 0,21 | 0,37 | 0,25 | 0,26 | 0,13 | 0,29 | 0,18 | 0,16 | 0,24 | 0,38 | 0,26 | 0,28 | 0,39 | 0,38 | 0,38 | 0,30 | 0,45 | 0,52 | 0,33 | 1,00 | 0,59 | 0,37 | 0,44 | 0,50 | 0,55 | 0,48 | 0,48 | 0,33 | 0,48 | 0,49 | 0,51 | 0,53 | 0,49 | 0,64 | 0,34 | 0,43 | 0,46 |
| B8  | 0,21 | 0,19 | 0,20 | 0,31 | 0,27 | 0,24 | 0,33 | 0,19 | 0,22 | 0,06 | 0,27 | 0,21 | 0,25 | 0,32 | 0,28 | 0,24 | 0,23 | 0,29 | 0,37 | 0,37 | 0,29 | 0,43 | 0,58 | 0,47 | 0,59 | 1,00 | 0,23 | 0,46 | 0,40 | 0,51 | 0,40 | 0,51 | 0,42 | 0,49 | 0,49 | 0,44 | 0,58 | 0,56 | 0,52 | 0,46 | 0,39 | 0,51 |
| B9  | 0,19 | 0,16 | 0,22 | 0,10 | 0,24 | 0,21 | 0,24 | 0,20 | 0,11 | 0,08 | 0,13 | 0,14 | 0,10 | 0,14 | 0,28 | 0,21 | 0,25 | 0,18 | 0,17 | 0,14 | 0,09 | 0,18 | 0,16 | 0,08 | 0,37 | 0,23 | 1,00 | 0,14 | 0,26 | 0,25 | 0,19 | 0,22 | 0,18 | 0,22 | 0,31 | 0,22 | 0,26 | 0,16 | 0,32 | 0,16 | 0,22 | 0,27 |
| B10 | 0,20 | 0,21 | 0,19 | 0,26 | 0,24 | 0,26 | 0,27 | 0,23 | 0,24 | 0,16 | 0,27 | 0,21 | 0,20 | 0,29 | 0,22 | 0,29 | 0,20 | 0,30 | 0,58 | 0,48 | 0,45 | 0,49 | 0,40 | 0,33 | 0,44 | 0,46 | 0,14 | 1,00 | 0,37 | 0,43 | 0,35 | 0,40 | 0,36 | 0,38 | 0,43 | 0,37 | 0,46 | 0,42 | 0,42 | 0,37 | 0,36 | 0,39 |
| B11 | 0,27 | 0,30 | 0,22 | 0,24 | 0,29 | 0,17 | 0,26 | 0,21 | 0,21 | 0,18 | 0,23 | 0,24 | 0,16 | 0,18 | 0,37 | 0,24 | 0,21 | 0,45 | 0,37 | 0,37 | 0,25 | 0,33 | 0,37 | 0,27 | 0,50 | 0,40 | 0,26 | 0,37 | 1,00 | 0,44 | 0,40 | 0,37 | 0,26 | 0,35 | 0,40 | 0,42 | 0,41 | 0,40 | 0,47 | 0,34 | 0,35 | 0,35 |
| C1  | 0,21 | 0,19 | 0,20 | 0,20 | 0,22 | 0,18 | 0,30 | 0,20 | 0,23 | 0,08 | 0,19 | 0,17 | 0,18 | 0,21 | 0,34 | 0,22 | 0,22 | 0,34 | 0,36 | 0,36 | 0,27 | 0,45 | 0,42 | 0,31 | 0,55 | 0,51 | 0,25 | 0,43 | 0,44 | 1,00 | 0,62 | 0,71 | 0,29 | 0,48 | 0,48 | 0,46 | 0,53 | 0,49 | 0,59 | 0,33 | 0,38 | 0,45 |
| C2  | 0,22 | 0,23 | 0,13 | 0,18 | 0,24 | 0,18 | 0,28 | 0,17 | 0,20 | 0,00 | 0,16 | 0,17 | 0,15 | 0,21 | 0,34 | 0,12 | 0,13 | 0,29 | 0,29 | 0,35 | 0,28 | 0,41 | 0,36 | 0,21 | 0,48 | 0,40 | 0,19 | 0,35 | 0,40 | 0,62 | 1,00 | 0,66 |      |      |      |      |      |      |      |      |      |      |
