# Supplementary material for: Transcultural adaptation and psychometric study of the French version of the nursing home survey on patient safety culture questionnaire
Source: Springer Nature journal article supplement (doi:10.1186/s12913-019-4333-5), 2019-07-15
Supplement: MOESM6 [file 16929746]

## Additional file 6

Table: Description of item responses per answer choices (percentages)

| Dimensions / Items                                                                                            | Strongly disagree | Disagree | Neither agree nor disagree | Agree            | Strongly agree | Missing value |
|---------------------------------------------------------------------------------------------------------------|-------------------|----------|----------------------------|------------------|----------------|---------------|
| <b>Teamwork</b>                                                                                               |                   |          |                            |                  |                |               |
| A1 – Staff in the nursing home treat each other with respect                                                  | 1.5               | 4.5      | 35.1                       | 44.8             | 14.1           | 2.7           |
| A2 – Staff support one another in this nursing home                                                           | 1.7               | 5.3      | 43.0                       | 38.9             | 11.1           | 3.6           |
| A5 – Staff feel like they are part of a team                                                                  | 1.7               | 4.5      | 24.5                       | 51.9             | 17.4           | 5.4           |
| A9 – When someone gets really busy in this nursing home, other staff help out                                 | 1.8               | 4.9      | 37.8                       | 41.7             | 13.8           | 6.1           |
| <b>Staffing</b>                                                                                               |                   |          |                            |                  |                |               |
| A3 –We have enough staff to handle the workload                                                               | 25.7              | 29.3     | 30.3                       | 12.3             | 2.3            | 4.2           |
| A8R – Staff have to hurry because they have too much work to do                                               | 2.1               | 8.3      | 23.3                       | 39.3             | 26.9           | 5.7           |
| <b>Compliance with procedures</b>                                                                             |                   |          |                            |                  |                |               |
| A6R – Staff use shortcuts to get their work done faster                                                       | 11.0              | 34.0     | 30.7                       | 21.0             | 3.3            | 11.9          |
| A14R – To make work easier, staff often ignore procedures                                                     | 12.5              | 50.8     | 26.3                       | 9.3              | 1.1            | 12.0          |
| <b>Supervisor expectations and actions promoting resident safety</b>                                          |                   |          |                            |                  |                |               |
| C1 – My supervisor listens to staff ideas and suggestions about resident safety                               | 1.0               | 3.9      | 14.0                       | 45.9             | 35.2           | 9.0           |
| C2 – My supervisor says a good word to staff who follow the right procedures                                  | 4.3               | 9.4      | 12.4                       | 35.0             | 38.9           | 13.2          |
| <b>Overall perceptions of resident safety / Organizational learning</b>                                       |                   |          |                            |                  |                |               |
| D6 – This nursing home does a good job keeping resident safe                                                  | 0.5               | 3.1      | 14.7                       | 55.7             | 26.0           | 5.9           |
| D8 – This nursing home is a safe place for residents                                                          | 0.4               | 1.9      | 8.8                        | 56.6             | 32.2           | 5.5           |
| D4 – It is easy to make changes to improve resident safety in this nursing home                               | 1.4               | 8.3      | 26.5                       | 52.3             | 11.4           | 12.6          |
| D5 – This nursing home is always doing things to improve resident safety                                      | 0.7               | 4.2      | 17.2                       | 50.3             | 27.5           | 8.5           |
| D10 – When this nursing home makes changes to improve resident safety, it checks to see if the changes worked | 3.0               | 9.6      | 19.0                       | 43.5             | 24.9           | 19.1          |
| Dimensions / Items                                                                                            | Never             | Rarely   | Sometimes                  | Most of the time | Always         | Missing value |
| <b>Handoffs (transfer of information)</b>                                                                     |                   |          |                            |                  |                |               |
| B1 – Staff are told what they need to know before taking                                                      | 0.8               | 5.4      | 16.6                       | 56.7             | 20.4           | 10.0          |

care of a resident for the first time

|                                                                                 |     |     |      |      |      |     |
|---------------------------------------------------------------------------------|-----|-----|------|------|------|-----|
| B2 – Staff are told right away when there is a change in a resident's care plan | 0.6 | 3.6 | 16.4 | 57.4 | 21.9 | 9.6 |
|---------------------------------------------------------------------------------|-----|-----|------|------|------|-----|

|                                                                                            |     |     |      |      |      |      |
|--------------------------------------------------------------------------------------------|-----|-----|------|------|------|------|
| B3 – We have all the information we need when residents are transferred from the hospitals | 1.0 | 8.8 | 27.2 | 49.7 | 13.3 | 10.2 |
|--------------------------------------------------------------------------------------------|-----|-----|------|------|------|------|

|                                                                           |     |     |      |      |      |     |
|---------------------------------------------------------------------------|-----|-----|------|------|------|-----|
| B10 – Staff are given all the information they need to care for residents | 0.5 | 2.5 | 13.6 | 62.3 | 21.2 | 8.5 |
|---------------------------------------------------------------------------|-----|-----|------|------|------|-----|

---

Feedback and communication about incidents

|                                                                                      |     |     |      |      |      |     |
|--------------------------------------------------------------------------------------|-----|-----|------|------|------|-----|
| B5 – In this nursing home, we talk about ways to keep incidents from happening again | 0.9 | 4.5 | 14.2 | 49.6 | 30.7 | 7.8 |
|--------------------------------------------------------------------------------------|-----|-----|------|------|------|-----|

|                                                                          |     |     |     |      |      |     |
|--------------------------------------------------------------------------|-----|-----|-----|------|------|-----|
| B6 – Staff tell someone if they see something that might harm a resident | 0.2 | 0.9 | 6.7 | 48.0 | 44.2 | 6.6 |
|--------------------------------------------------------------------------|-----|-----|-----|------|------|-----|

|                                                                             |     |     |      |      |      |     |
|-----------------------------------------------------------------------------|-----|-----|------|------|------|-----|
| B8 – In this nursing home, we discuss ways to keep residents safe from harm | 0.7 | 3.6 | 14.3 | 46.0 | 35.3 | 7.2 |
|-----------------------------------------------------------------------------|-----|-----|------|------|------|-----|

---

NOTE: items flagged R: response scores are reversed to preserve the negative meaning
