# Supplementary material for: Transcultural adaptation and psychometric study of the French version of the nursing home survey on patient safety culture questionnaire
Source: Springer Nature journal article supplement (doi:10.1186/s12913-019-4333-5), 2019-07-15
Supplement: MOESM7 [file 16929746]

Additional file 7

Table 1: Indicators to assess the global fit of the final structural equation model (R output)

| npar                | fmin            | chisq              | df         | pvalue            | baseline.chisq    |
|---------------------|-----------------|--------------------|------------|-------------------|-------------------|
| 65.000              | 0.435           | 346.275            | 188.000    | 0.000             | 4165.487          |
| baseline.df         | baseline.pvalue | cfi                | tli        | nnfi              | rfi               |
| 231.000             | 0.000           | 0.960              | 0.951      | 0.951             | 0.898             |
| nfi                 | pnfi            | ifi                | rni        | logl              | unrestricted.logl |
| 0.917               | 0.746           | 0.960              | 0.960      | -9101.495         | -8927.923         |
| aic                 | bic             | ntotal             | bic2       | rmsea             | rmsea.ci.lower    |
| 18332.991           | 18592.273       | 399.000            | 18386.025  | 0.046             | 0.038             |
| rmsea.ci.upper      | rmsea.pvalue    | rmr                | rmr_nomean | srmr              | srmr_bentler      |
| 0.054               | 0.803           | 0.031              | 0.031      | 0.044             | 0.044             |
| srmr_bentler_nomean | srmr_bollen     | srmr_bollen_nomean | srmr_mplus | srmr_mplus_nomean | cn_05             |
| 0.044               | 0.044           | 0.044              | 0.044      | 0.044             | 255.001           |
| cn_01               | gfi             | agfi               | pgfi       | mfi               | ecvi              |
| 272.284             | 0.928           | 0.903              | 0.689      | 0.820             | 1.197             |

Table 2: Parameter estimates of the final structural equation model (R output)

| lhs | op | rhs | Est   | se    | z      | pvalue |
|-----|----|-----|-------|-------|--------|--------|
| f1  | =~ | A1  | 1.000 | 0.000 | NA     | NA     |
| f1  | =~ | A2  | 1.042 | 0.063 | 16.541 | 0.000  |
| f1  | =~ | A5  | 0.842 | 0.058 | 14.556 | 0.000  |
| f1  | =~ | A9  | 0.772 | 0.065 | 11.911 | 0.000  |
| f2  | =~ | B1  | 1.000 | 0.000 | NA     | NA     |
| f2  | =~ | B2  | 0.867 | 0.066 | 13.206 | 0.000  |
| f2  | =~ | B3  | 0.894 | 0.075 | 11.886 | 0.000  |
| f2  | =~ | B10 | 0.962 | 0.064 | 15.005 | 0.000  |
| f3  | =~ | B5  | 1.000 | 0.000 | NA     | NA     |
| f3  | =~ | B6  | 0.530 | 0.056 | 9.411  | 0.000  |
| f3  | =~ | B8  | 1.053 | 0.073 | 14.471 | 0.000  |
| f4  | =~ | C1  | 1.000 | 0.000 | NA     | NA     |
| f4  | =~ | C2  | 1.105 | 0.085 | 13.050 | 0.000  |
| f5  | =~ | D4  | 1.000 | 0.000 | NA     | NA     |
| f5  | =~ | D5  | 1.567 | 0.116 | 13.459 | 0.000  |
| f5  | =~ | D6  | 1.395 | 0.104 | 13.364 | 0.000  |
| f5  | =~ | D8  | 1.081 | 0.092 | 11.763 | 0.000  |
| f5  | =~ | D10 | 1.446 | 0.126 | 11.501 | 0.000  |
| f6  | =~ | A6  | 1.000 | 0.000 | NA     | NA     |
| f6  | =~ | A14 | 0.795 | 0.095 | 8.379  | 0.000  |
| f7  | =~ | A3  | 1.000 | 0.000 | NA     | NA     |
| f7  | =~ | A8  | 1.199 | 0.158 | 7.567  | 0.000  |
| A1  | ~~ | A1  | 0.251 | 0.026 | 9.555  | 0.000  |
| A2  | ~~ | A2  | 0.209 | 0.025 | 8.294  | 0.000  |

|       |    |     |       |       |        |       |
|-------|----|-----|-------|-------|--------|-------|
| A5    | ~~ | A5  | 0.291 | 0.025 | 11.421 | 0.000 |
| A9    | ~~ | A9  | 0.467 | 0.037 | 12.739 | 0.000 |
| B1    | ~~ | B1  | 0.304 | 0.028 | 10.890 | 0.000 |
| B2    | ~~ | B2  | 0.303 | 0.026 | 11.703 | 0.000 |
| B3    | ~~ | B3  | 0.470 | 0.038 | 12.475 | 0.000 |
| B10   | ~~ | B10 | 0.192 | 0.020 | 9.401  | 0.000 |
| B5    | ~~ | B5  | 0.320 | 0.029 | 10.955 | 0.000 |
| B6    | ~~ | B6  | 0.301 | 0.023 | 13.210 | 0.000 |
| B8    | ~~ | B8  | 0.224 | 0.025 | 8.883  | 0.000 |
| C1    | ~~ | C1  | 0.183 | 0.033 | 5.550  | 0.000 |
| C2    | ~~ | C2  | 0.599 | 0.056 | 10.639 | 0.000 |
| D4    | ~~ | D4  | 0.436 | 0.032 | 13.432 | 0.000 |
| D5    | ~~ | D5  | 0.144 | 0.016 | 8.828  | 0.000 |
| D6    | ~~ | D6  | 0.130 | 0.014 | 9.442  | 0.000 |
| D8    | ~~ | D8  | 0.256 | 0.020 | 12.752 | 0.000 |
| D10   | ~~ | D10 | 0.522 | 0.040 | 12.922 | 0.000 |
| A6    | ~~ | A6  | 0.437 | 0.066 | 6.601  | 0.000 |
| A14   | ~~ | A14 | 0.283 | 0.042 | 6.717  | 0.000 |
| A3    | ~~ | A3  | 0.488 | 0.070 | 6.928  | 0.000 |
| A8    | ~~ | A8  | 0.292 | 0.091 | 3.224  | 0.001 |
| <hr/> |    |     |       |       |        |       |
| f1    | ~~ | f1  | 0.459 | 0.051 | 9.023  | 0.000 |
| f2    | ~~ | f2  | 0.395 | 0.048 | 8.221  | 0.000 |
| f3    | ~~ | f3  | 0.379 | 0.048 | 7.936  | 0.000 |
| f4    | ~~ | f4  | 0.517 | 0.057 | 9.120  | 0.000 |
| f5    | ~~ | f5  | 0.249 | 0.039 | 6.432  | 0.000 |
| f6    | ~~ | f6  | 0.539 | 0.085 | 6.325  | 0.000 |
| f7    | ~~ | f7  | 0.501 | 0.087 | 5.793  | 0.000 |
| f1    | ~~ | f2  | 0.169 | 0.028 | 5.959  | 0.000 |
| f1    | ~~ | f3  | 0.179 | 0.029 | 6.171  | 0.000 |
| f1    | ~~ | f4  | 0.184 | 0.032 | 5.755  | 0.000 |
| f1    | ~~ | f5  | 0.112 | 0.022 | 5.163  | 0.000 |
| f1    | ~~ | f6  | 0.180 | 0.036 | 5.072  | 0.000 |
| f1    | ~~ | f7  | 0.069 | 0.030 | 2.260  | 0.024 |
| f2    | ~~ | f3  | 0.272 | 0.032 | 8.395  | 0.000 |
| f2    | ~~ | f4  | 0.289 | 0.034 | 8.421  | 0.000 |
| f2    | ~~ | f5  | 0.204 | 0.026 | 7.721  | 0.000 |
| f2    | ~~ | f6  | 0.160 | 0.033 | 4.797  | 0.000 |
| f2    | ~~ | f7  | 0.147 | 0.032 | 4.527  | 0.000 |
| f3    | ~~ | f4  | 0.335 | 0.037 | 9.139  | 0.000 |
| f3    | ~~ | f5  | 0.234 | 0.029 | 8.148  | 0.000 |
| f3    | ~~ | f6  | 0.227 | 0.037 | 6.205  | 0.000 |
| f3    | ~~ | f7  | 0.135 | 0.032 | 4.198  | 0.000 |
| f4    | ~~ | f5  | 0.241 | 0.030 | 8.126  | 0.000 |
| f4    | ~~ | f6  | 0.200 | 0.039 | 5.164  | 0.000 |
| f4    | ~~ | f7  | 0.122 | 0.035 | 3.489  | 0.000 |
| f5    | ~~ | f6  | 0.158 | 0.028 | 5.642  | 0.000 |

|    |    |    |       |       |       |       |
|----|----|----|-------|-------|-------|-------|
| f5 | ~~ | f7 | 0.145 | 0.028 | 5.222 | 0.000 |
| f6 | ~~ | f7 | 0.189 | 0.042 | 4.514 | 0.000 |

---
