# Supplementary material for: Transcultural adaptation and psychometric study of the French version of the nursing home survey on patient safety culture questionnaire
Source: BMC Health Serv Res. 2019 Jul 15;19:490. doi: 10.1186/s12913-019-4333-5 (PMC6631961; doi:10.1186/s12913-019-4333-5)
Supplement: Supplementary file 1 — a. Nursing Home Survey on Patient Safety. b. French version of the NHSOPS questionnaire. (ZIP 334 kb) [file 12913_2019_4333_MOESM1_ESM.zip]

Archive with 2 entries (2 files):
- Additional file 1a_nhsurveyR5.pdf
- Additional file 1b_frenchsurveyR5.pdf
